# Supplementary material for: Intrathecal delivery of human ESC-derived mesenchymal stem cell spheres promotes recovery of a primate multiple sclerosis model
Source: PubMed Central journal article supplement (PMC6102276; doi:10.1038/s41420-018-0091-0), 2018-08-20

**Fig. S1**

**A**

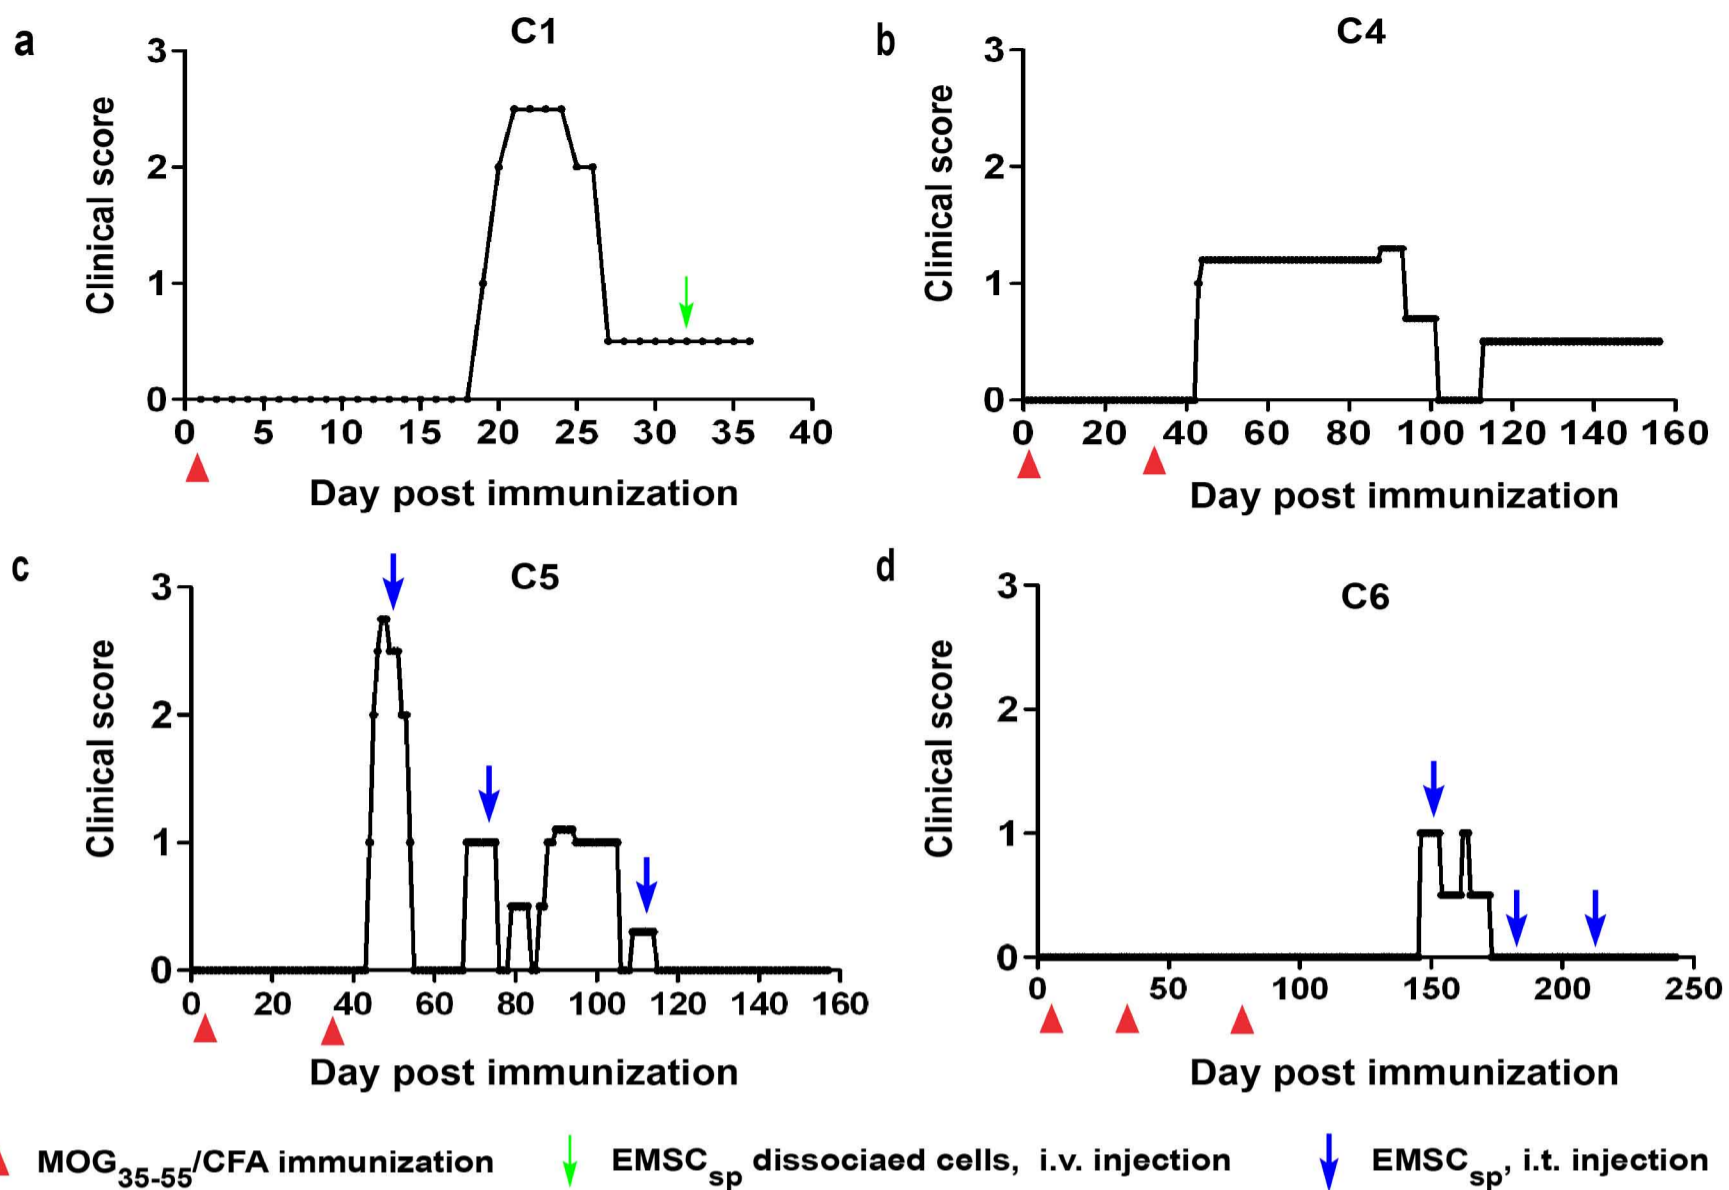

**B**

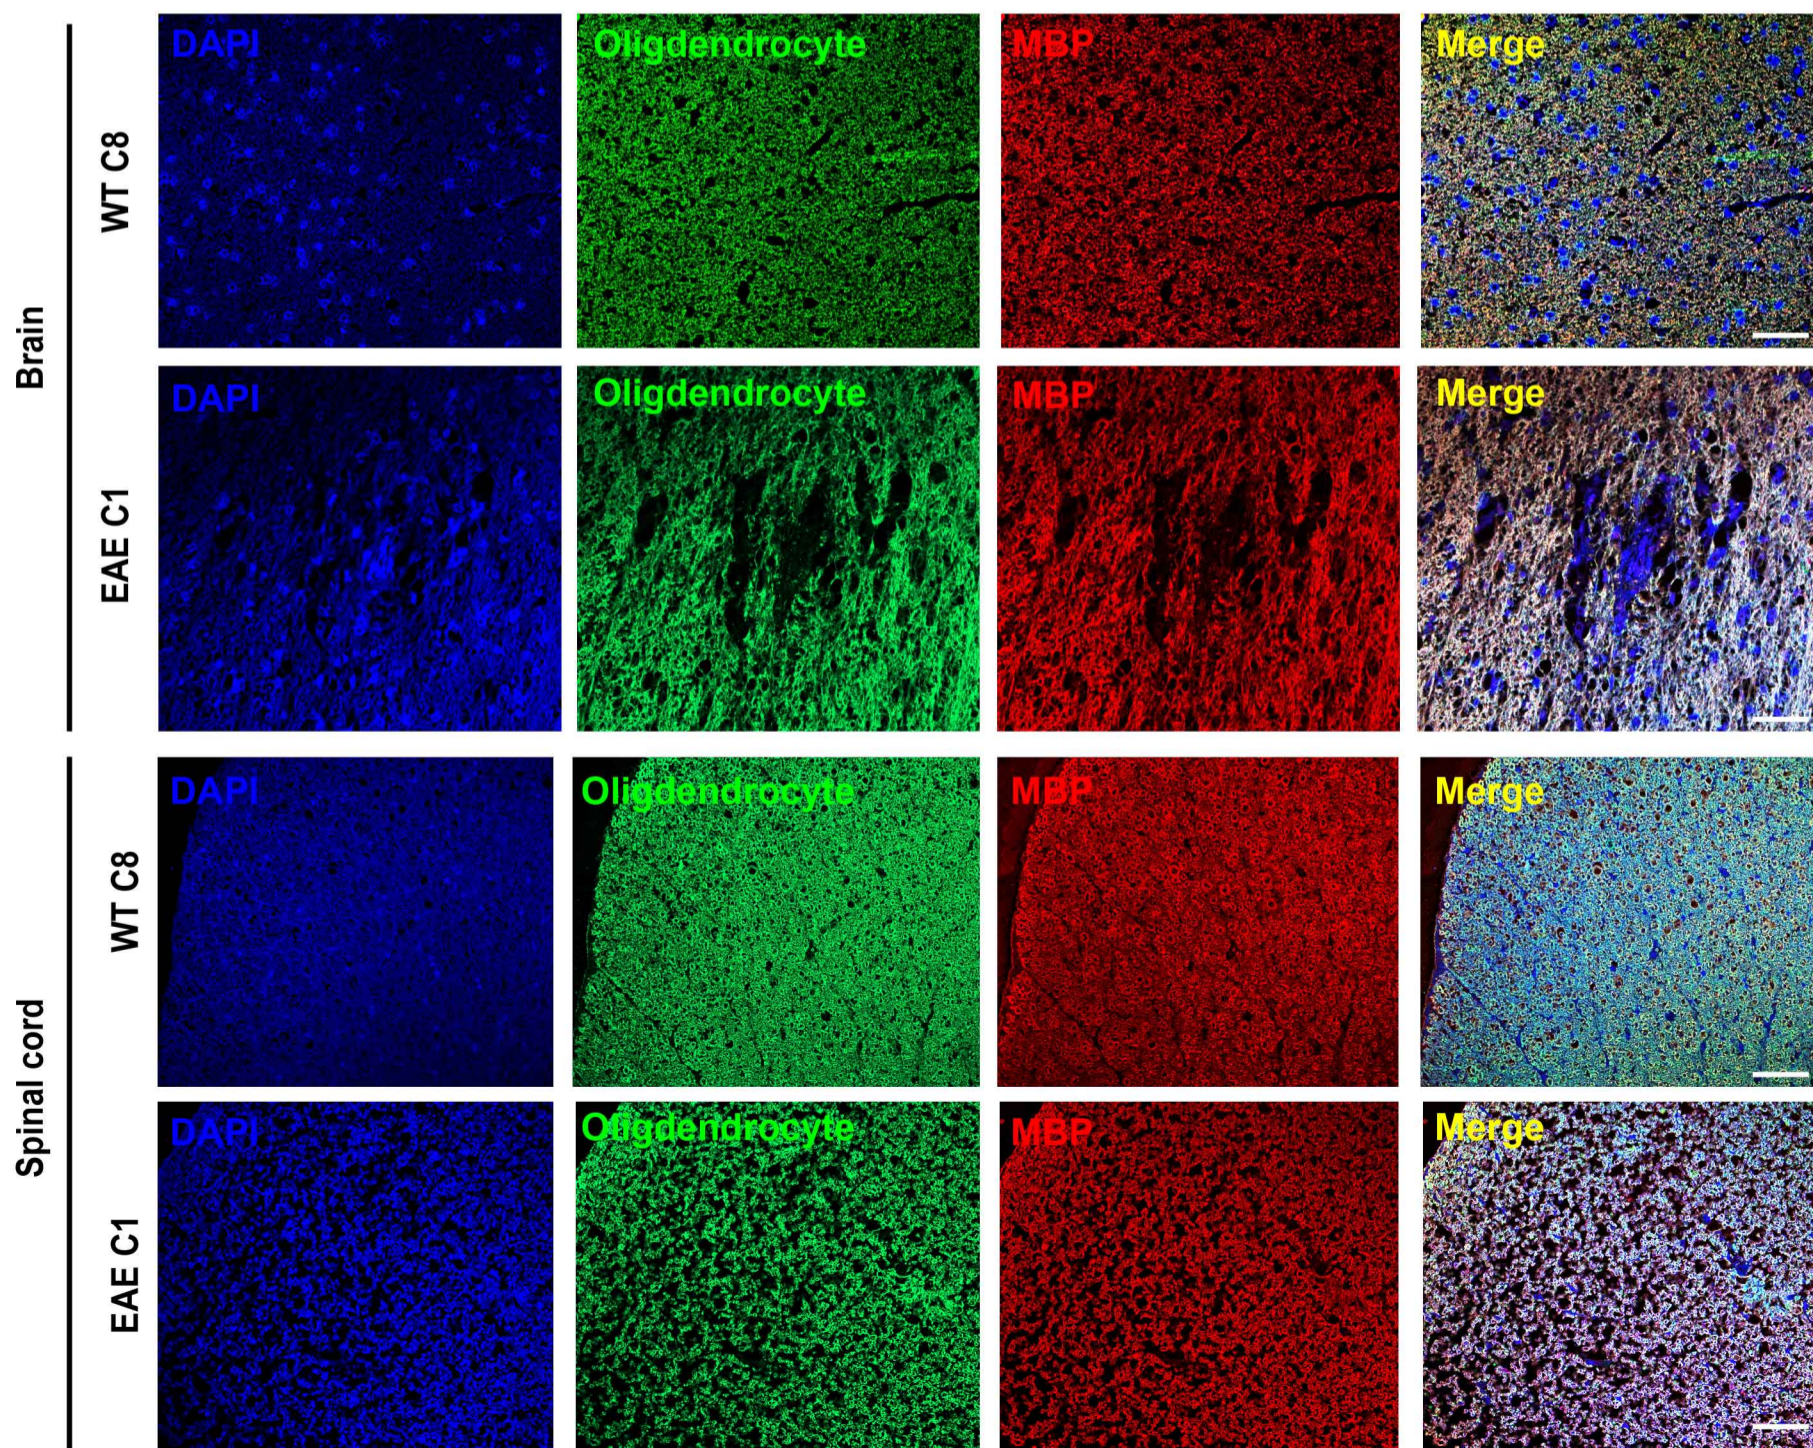

**Fig. S2**

**A**

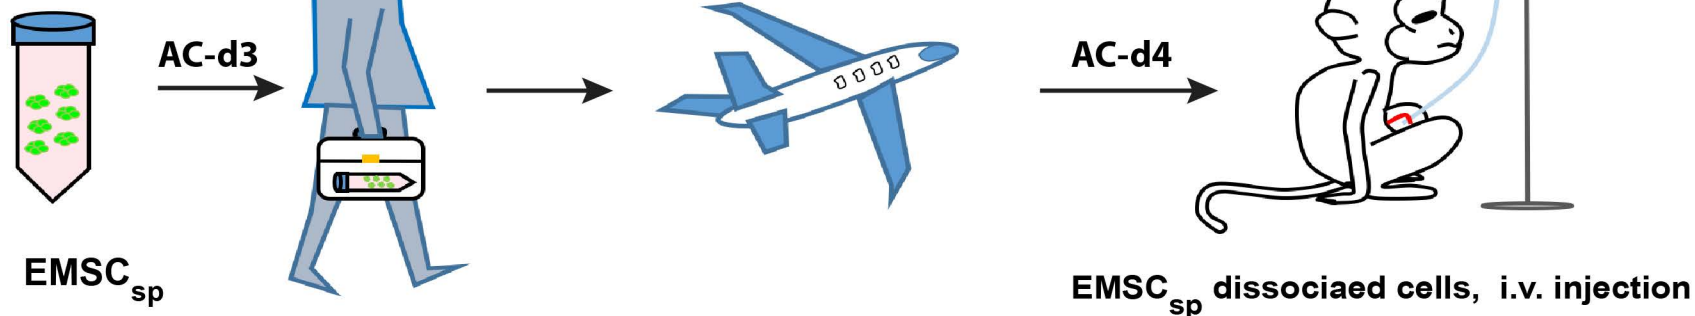

**B**

**a** Viability test of cells dissociated from EMSC<sub>sp</sub>-AC-d4

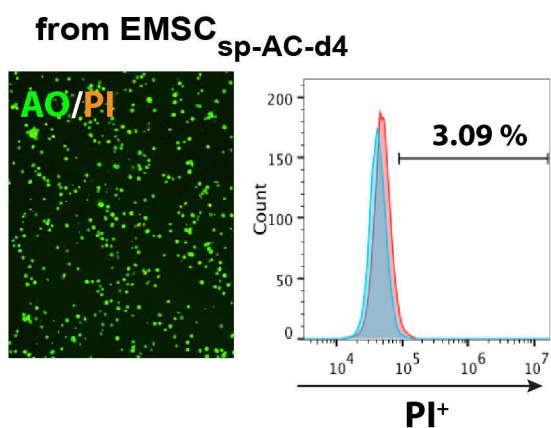

**b** Table for the experimental overview

| Monkey # | Day of immunization | Day of symptom onset | Day of brain lesion detected via MRI | Day of EMSC i.v. injection | Day of sacrifice (Day post i.v. injection) |
|----------|---------------------|----------------------|--------------------------------------|----------------------------|--------------------------------------------|
| C1       | 1                   | 19                   | 20                                   | 32                         | 36 (4)                                     |
| C2       | 1                   | —                    | 42                                   | 80                         | 81 (1)                                     |
| C3       | 1, 33, 77           | —                    | 119                                  | 150                        | 157 (7)                                    |
| C8 (WT)  | —                   | —                    | —                                    | 1                          | 4 (4)                                      |

**C**

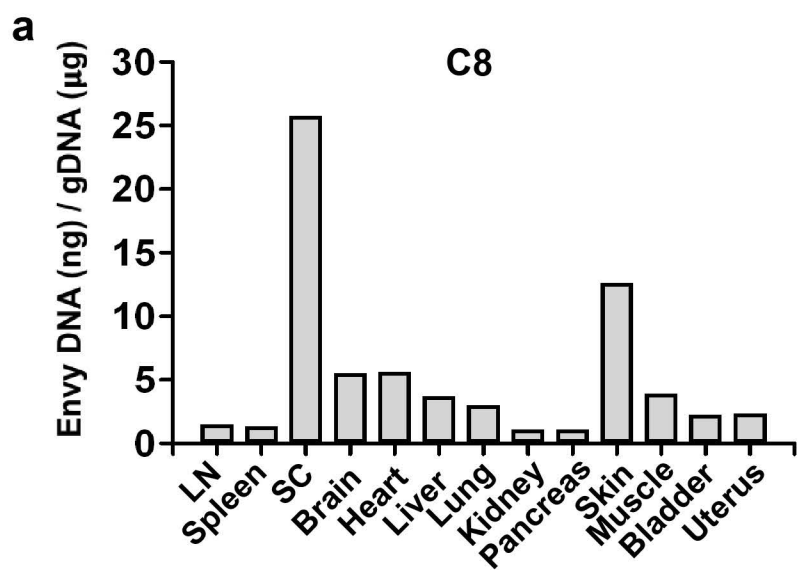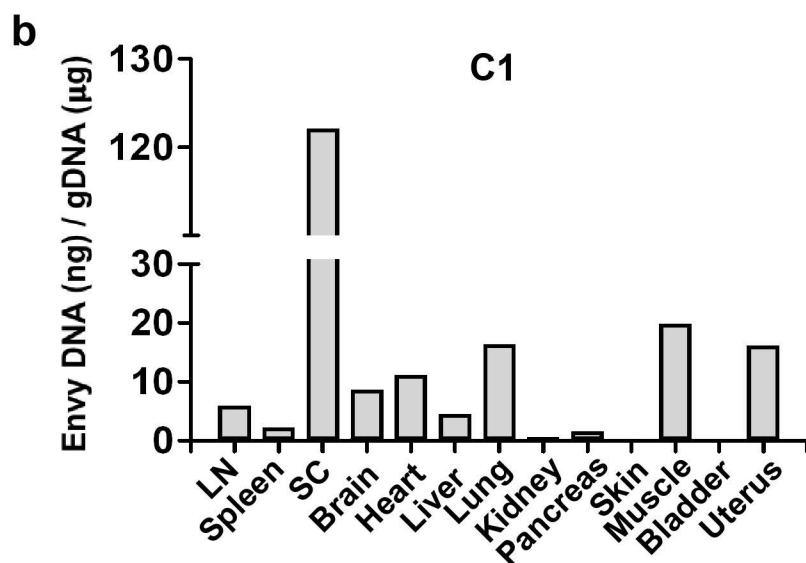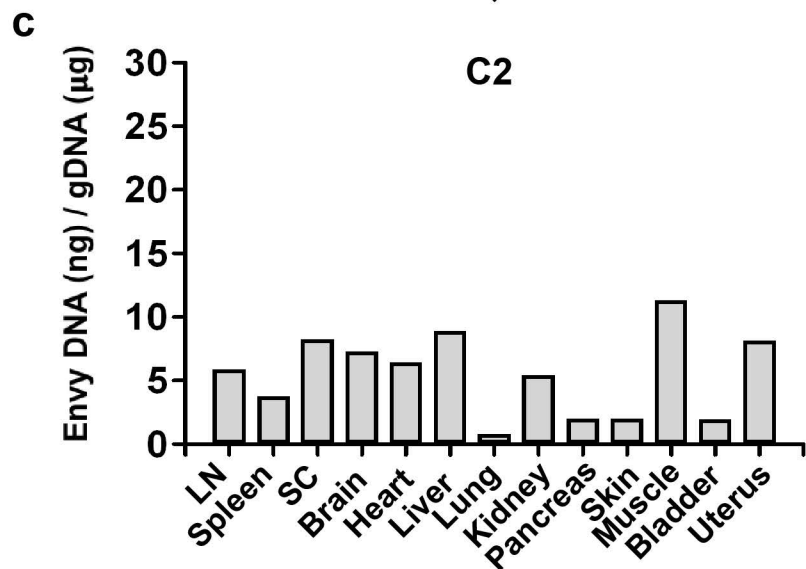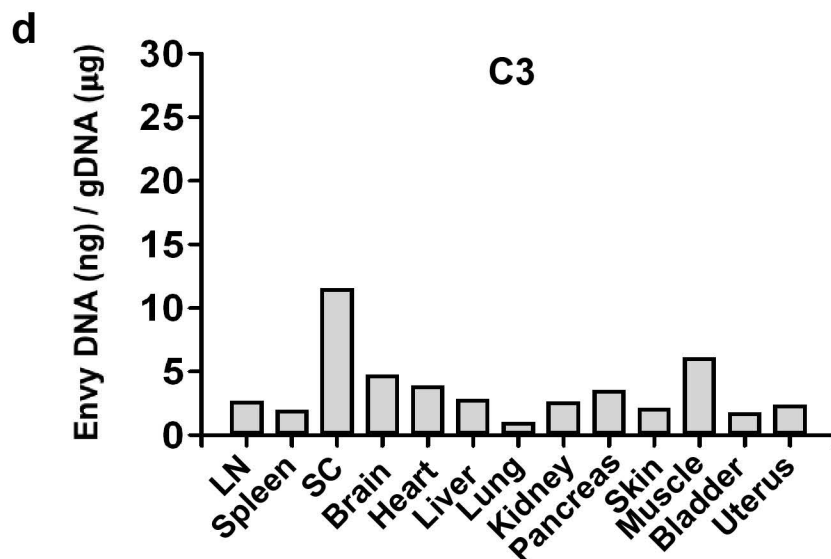

LN: Lymph node SC: Spinal cord

**Fig. S3**

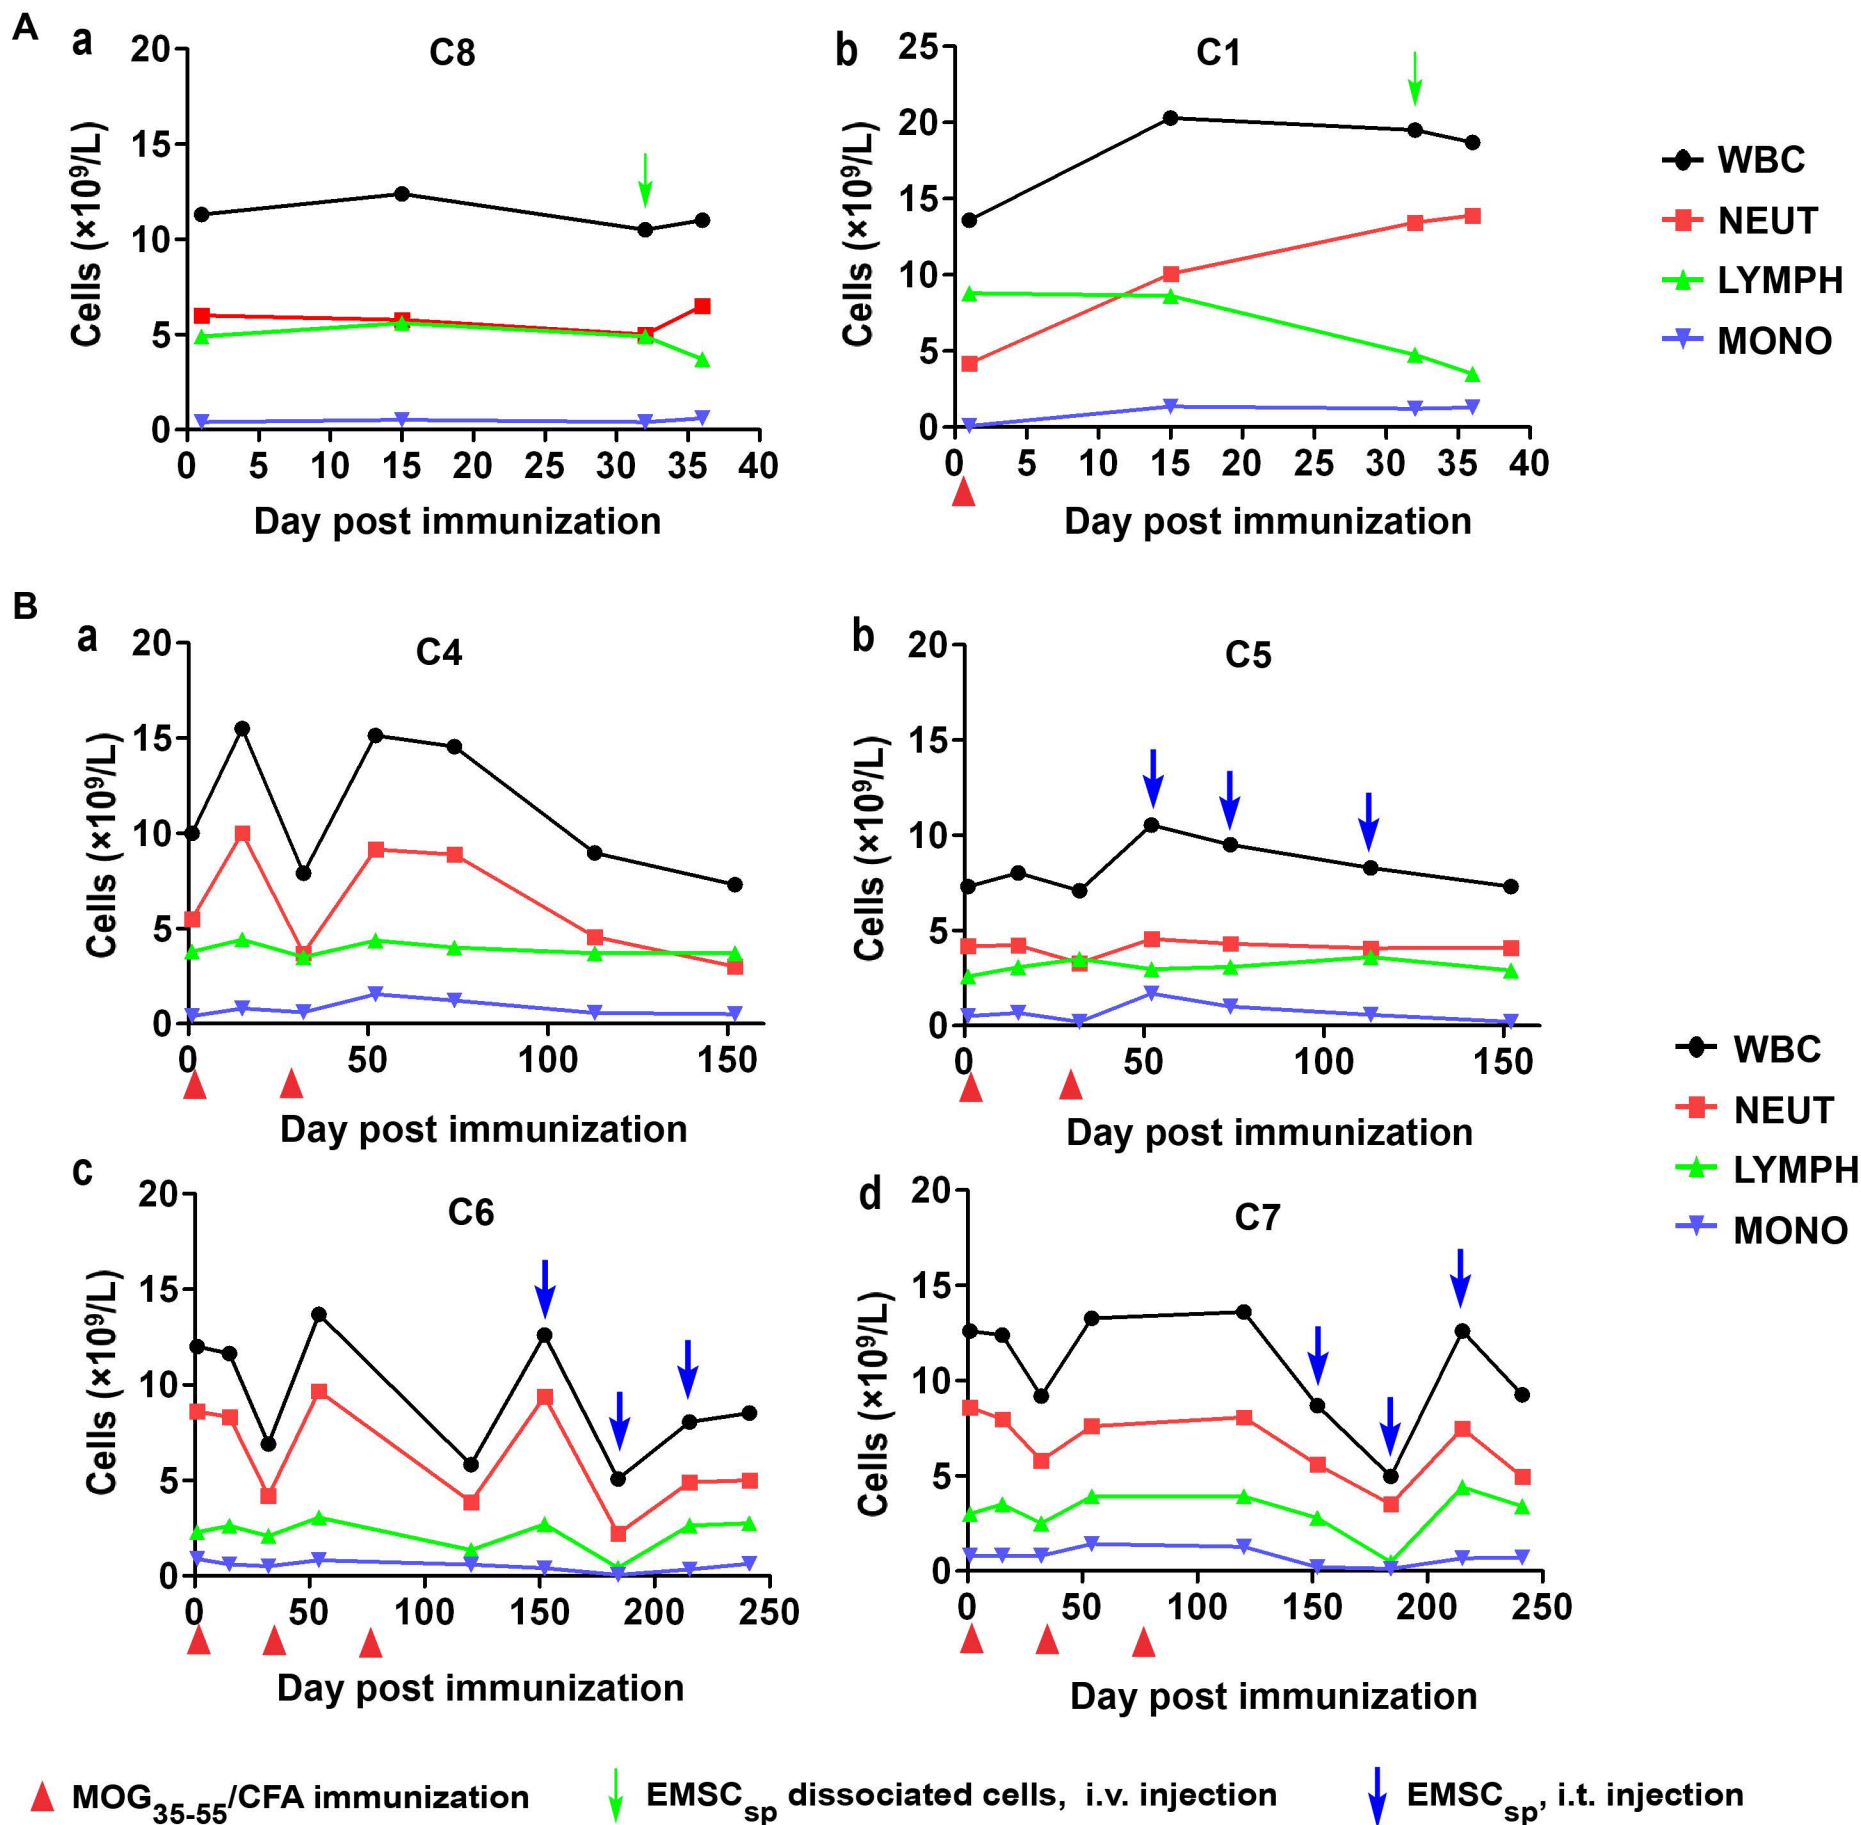

**Fig. S4**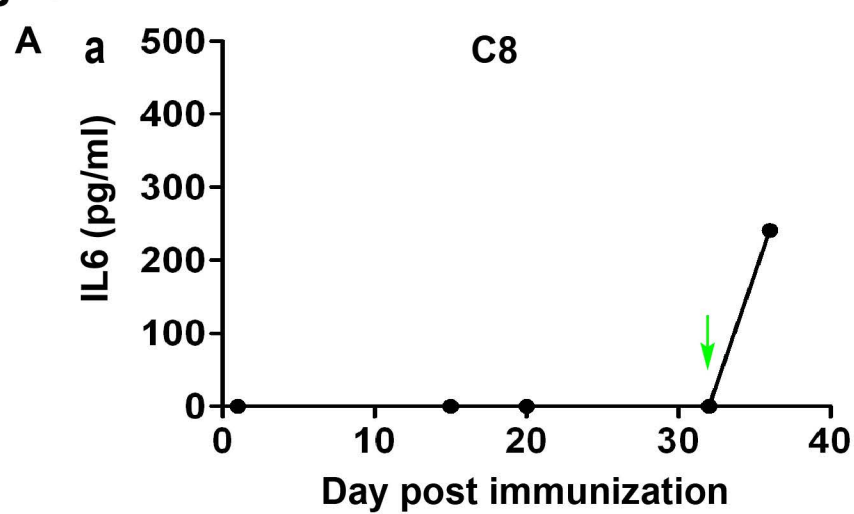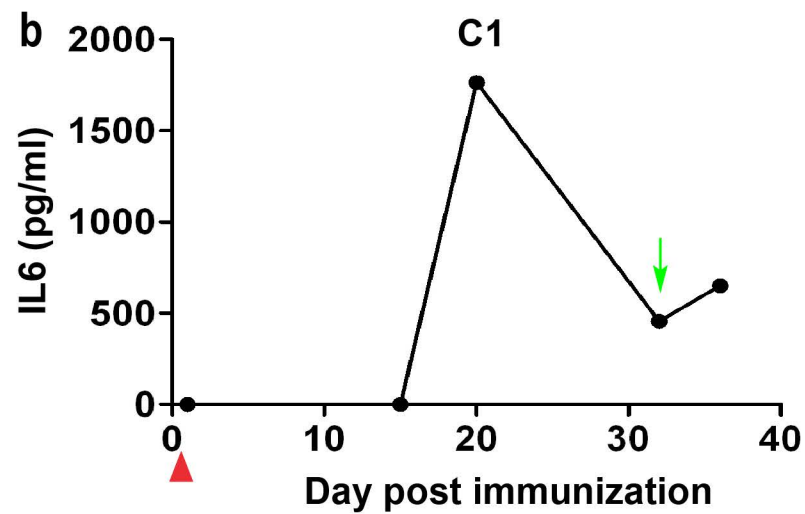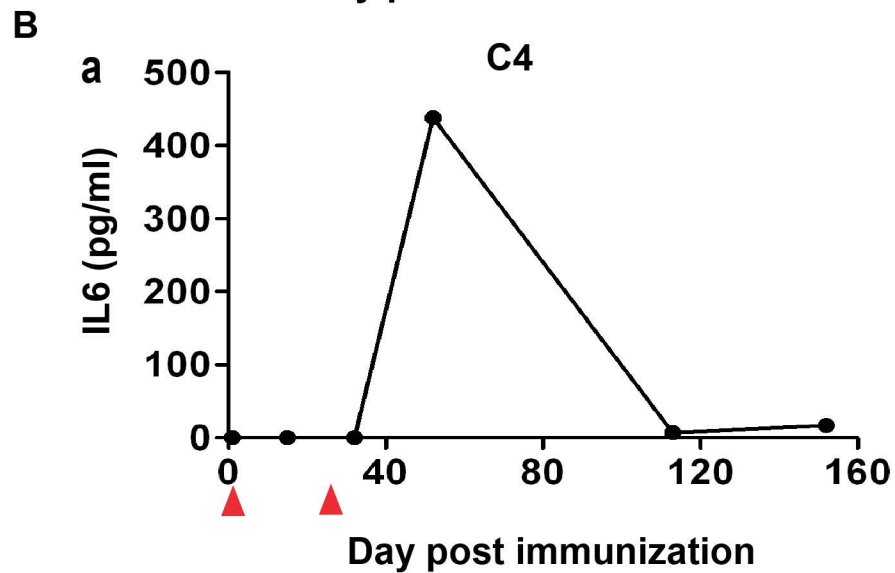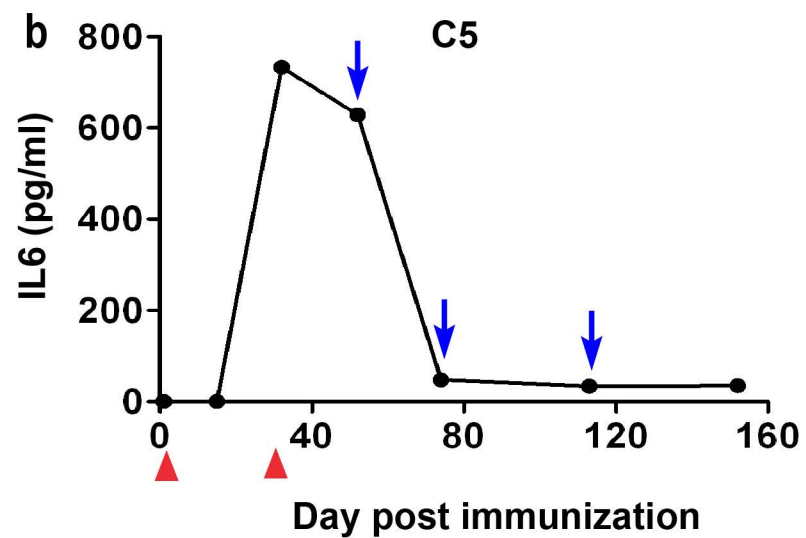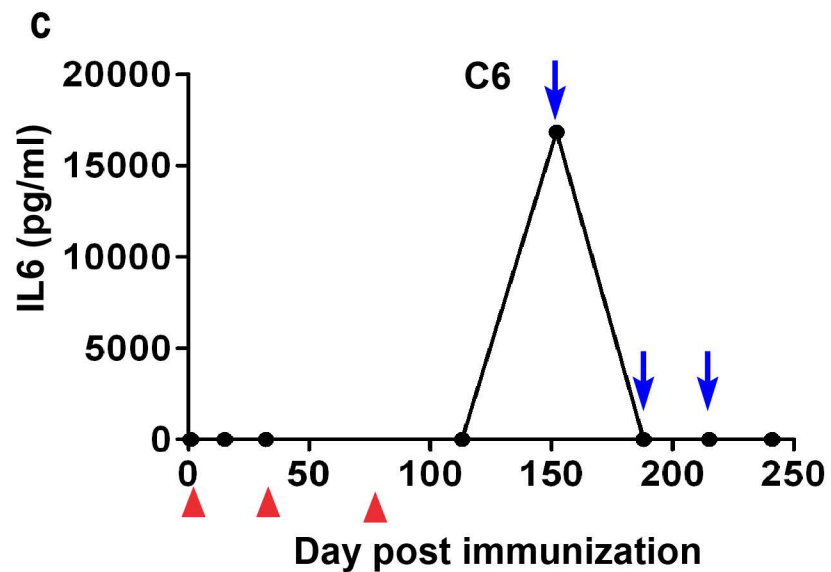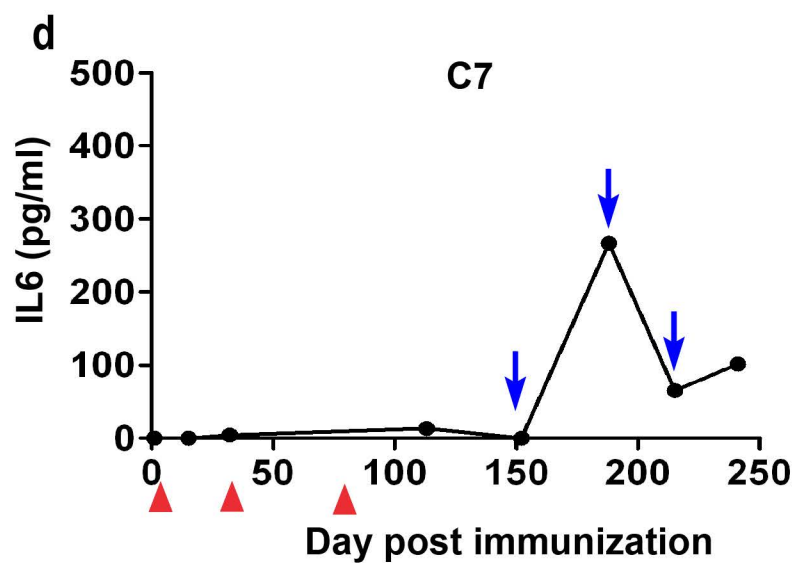

▲ MOG<sub>35-55</sub>/CFA immunization

▼ EMSC<sub>sp</sub> dissociated cells, i.v. injection

▼ EMSC<sub>sp</sub>, i.t. injection

**Fig. S5**

**A**

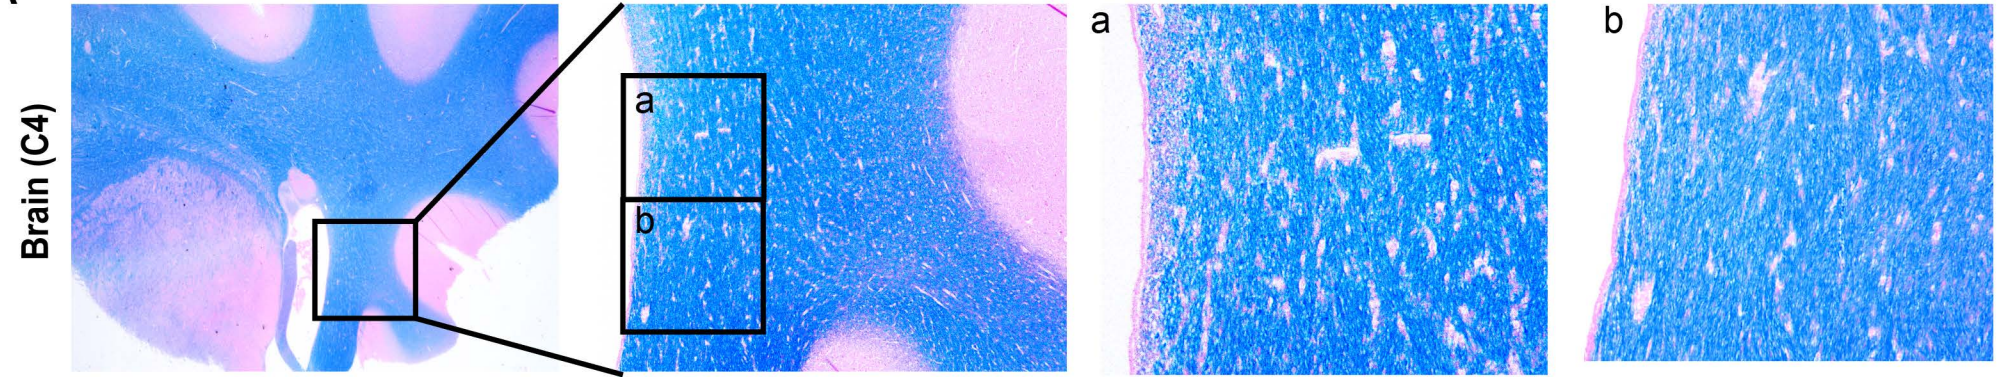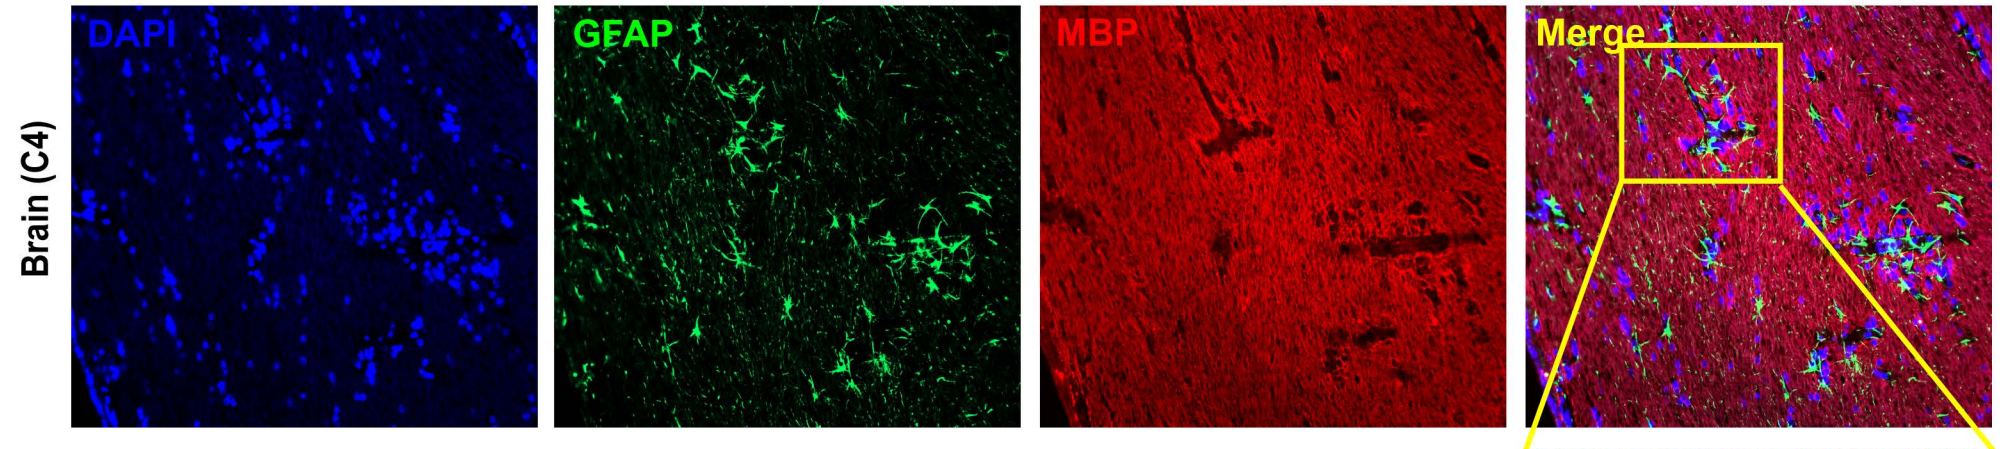

**B**

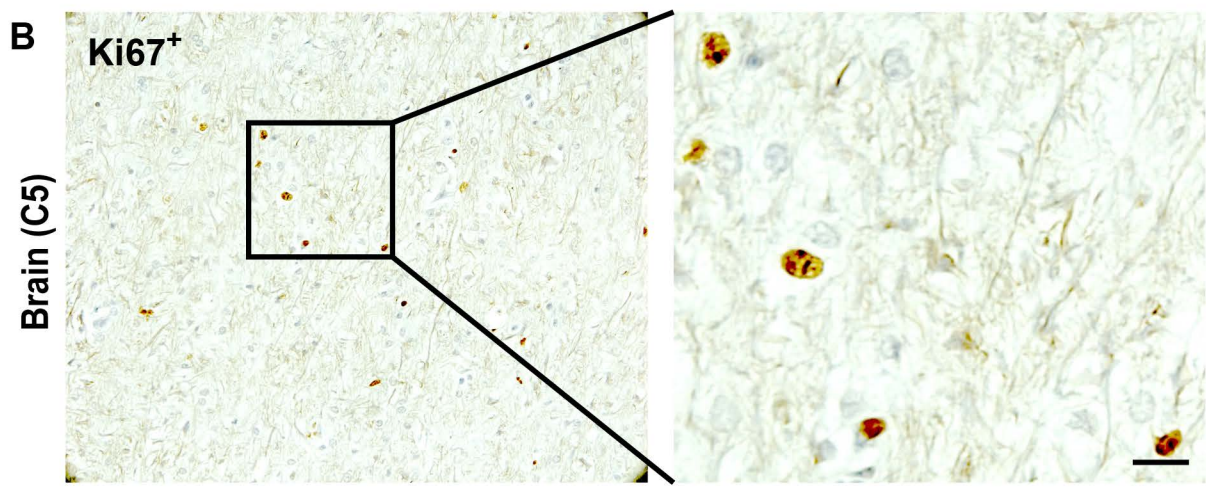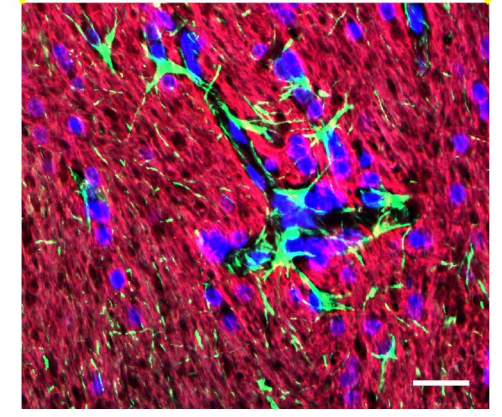

Supplement: 41420_2018_91_MOESM2_ESM.pdf [file 41420_2018_91_MOESM2_ESM.pdf]
